# Supplementary material for: 1,4-Dihydro-1,4-diphosphinine fused with two tetrathiafulvalenes
Source: Royal Society of Chemistry journal article supplement (doi:10.1039/b412193g), 2004-01-01
Supplement: b412193g.pdf [file b412193g.pdf]

## **1,4-Dihydro-1,4-diphosphinine fused with two tetrathiafulvalenes**

Narcis Avarvari\* and Marc Fourmigué\*

SUPPORTING INFORMATION

### ***Experimental Section***

Reactions were carried out under nitrogen, THF was distilled from Na/benzophenone. *o*-Me<sub>2</sub>TTF was prepared according to a literature method.<sup>1</sup> NMR spectra were recorded on a Bruker Avance DRX 500 spectrometer operating at 202.39 MHz for <sup>31</sup>P.

**1**: Butyllithium (4 mL of a solution 2M in hexane) was added dropwise to a solution of *o*-DMTTF (0.928 g, 4 mmol) and 1.2 mL diisopropylamine in 60 mL THF, at -78°C, under magnetic stirring. After a period of 3 h, PhPCl<sub>2</sub> (0.56 mL, 4 mmol) was added, then the temperature was allowed to rise slowly overnight up to room temperature. After filtration, evaporation of solvents and a rapid chromatographic purification on silica gel with toluene, **1** was recovered as a red solid (*cis/trans* ratio 15:1). Yield 0.35 g (26%). Recrystallization from THF or toluene afforded *cis*-**1**. <sup>31</sup>P NMR (THF): δ = -21.5 (s, *cis*-**1**), -25.6 (s, *trans*-**1**); elemental analysis (%): calcd for C<sub>28</sub>H<sub>22</sub>P<sub>2</sub>S<sub>8</sub> *cis*-**1**: C 49.68, H 3.28; found: C 49.74, H 3.41.

---

(1) Gerson, F.; Lamprecht, A.; Fourmigué, M. *J. Chem. Soc., Perkin Trans. 2* **1996**, 1409–1414.
